# Supplementary material for: Screening of effective NRR electrocatalysts among the Si-based MSi2N4 (M = Ti, Zr, Hf, V, Nb, Ta, Cr, Mo, and W) monolayers
Source: Royal Society of Chemistry journal article supplement (doi:10.1039/d1ta02998c), 2021-01-01
Supplement: d1ta02998c1.pdf [file d1ta02998c1.pdf]

## Supporting Information:

### Screening of Effective NRR Electrocatalysts among the Si-based MSi<sub>2</sub>N<sub>4</sub> (M = Ti, Zr, Hf, V, Nb, Ta, Cr, Mo, and W) Monolayers

*Yao Luo,<sup>1</sup> Mengyuan Li,<sup>1</sup> Yuxin Dai,<sup>1</sup> Xiaoli Zhang,<sup>1</sup> Renqiang Zhao,<sup>1</sup> Fan Jiang,<sup>1</sup>  
Chongyi Ling,<sup>2\*</sup> Yucheng Huang<sup>1\*</sup>*

<sup>1</sup>College of Chemistry and Material Science, Key Laboratory of Electrochemical Clean Energy of Anhui Higher Education Institutes, The Key Laboratory of Functional Molecular Solids, Ministry of Education, Anhui Laboratory of Molecule-Based Materials, Anhui Normal University, Wuhu 241000, China

<sup>2</sup>School of Physics, Southeast University, Nanjing, China

**E-mail:** [lingchy@seu.edu.cn](mailto:lingchy@seu.edu.cn) (C.L); [huangyc@mail.ahnu.edu.cn](mailto:huangyc@mail.ahnu.edu.cn) (Y.H)

**Table S1.** Vibrational frequencies, zero point energies and entropy of different adsorption species at 298.15 K on the TiSi<sub>2</sub>N<sub>4</sub>.

| Adsorption Species  | Vibrational Frequencies (cm <sup>-1</sup> ) |          |          |          |          |          | E <sub>ZPE</sub> (eV) | TS (eV) |
|---------------------|---------------------------------------------|----------|----------|----------|----------|----------|-----------------------|---------|
| *N-N                | 1363.954                                    | 592.946  | 400.387  | 295.246  | 289.073  | 185.576  | 0.230                 | 0.038   |
| *N-NH               | 3201.160                                    | 1312.248 | 988.396  | 751.756  | 621.717  | 474.223  | 0.551                 | 0.075   |
|                     | 345.459                                     | 317.936  | 239.098  |          |          |          |                       |         |
| *NH-NH              | 3293.861                                    | 3281.939 | 1303.369 | 1271.091 | 929.295  | 765.065  | 0.798                 | 0.104   |
|                     | 683.174                                     | 534.238  | 425.233  | 321.020  | 269.057  | 224.955  |                       |         |
| *N-NH <sub>2</sub>  | 3343.887                                    | 3234.774 | 1576.444 | 1208.313 | 1083.594 | 887.279  | 0.835                 | 0.101   |
|                     | 485.925                                     | 382.437  | 358.434  | 328.733  | 202.469  | 184.244  |                       |         |
| *NH-NH <sub>2</sub> | 3429.753                                    | 3375.781 | 3326.654 | 1609.939 | 1349.624 | 1275.536 | 1.125                 | 0.158   |
|                     | 1126.768                                    | 914.628  | 653.784  | 525.350  | 338.496  | 268.952  |                       |         |
|                     | 160.227                                     | 119.730  | 68.321   |          |          |          |                       |         |
| *N                  | 740.812                                     | 559.530  | 490.204  |          |          |          | 0.115                 | 0.017   |
| *NH                 | 3168.836                                    | 989.956  | 816.674  | 583.708  | 439.831  | 368.494  | 0.391                 | 0.033   |
| *NH <sub>2</sub>    | 3438.404                                    | 3333.918 | 1501.757 | 702.281  | 554.504  | 391.843  | 0.659                 | 0.093   |
|                     | 255.257                                     | 241.165  | 202.327  |          |          |          |                       |         |
| *NH <sub>3</sub>    | 3466.364                                    | 3405.122 | 3238.110 | 1600.450 | 1591.995 | 1113.152 | 0.959                 | 0.226   |
|                     | 389.538                                     | 272.528  | 162.142  | 141.418  | 58.889   | 45.035   |                       |         |

**Table S2.** Lattice parameters of the 2D unit cell and the corresponding 3×3 supercell of the MSi<sub>2</sub>N<sub>4</sub> monolayers (in Å).

| NO. | Substrate                        | Lattice<br>constant (Å) | a(Å)  | b(Å)  |
|-----|----------------------------------|-------------------------|-------|-------|
| 1   | TiSi <sub>2</sub> N <sub>4</sub> | 2.932                   | 8.796 | 8.796 |
| 2   | HfSi <sub>2</sub> N <sub>4</sub> | 3.022                   | 9.066 | 9.066 |
| 3   | ZrSi <sub>2</sub> N <sub>4</sub> | 3.034                   | 9.102 | 9.102 |
| 4   | VSi <sub>2</sub> N <sub>4</sub>  | 2.883                   | 8.649 | 8.649 |
| 5   | NbSi <sub>2</sub> N <sub>4</sub> | 2.965                   | 8.895 | 8.895 |
| 6   | TaSi <sub>2</sub> N <sub>4</sub> | 2.967                   | 8.901 | 8.901 |
| 7   | CrSi <sub>2</sub> N <sub>4</sub> | 2.844                   | 8.532 | 8.532 |
| 8   | MoSi <sub>2</sub> N <sub>4</sub> | 2.909                   | 8.727 | 8.727 |
| 9   | WSi <sub>2</sub> N <sub>4</sub>  | 2.915                   | 8.745 | 8.745 |

**Table S3.** Calculated adsorption free energy ( $\Delta G$ ) of  $N_2$  on different size of the defective  $TiSi_2N_4$  periodic supercells.  $\Delta\Delta G$  is the energy difference with respect to  $\Delta G$  on the  $3\times 3$  periodic supercell (in eV).

|             | $\Delta G$ | $\Delta\Delta G$ |
|-------------|------------|------------------|
| $3\times 3$ | -0.42      | 0                |
| $4\times 4$ | -0.45      | 0.03             |
| $5\times 5$ | -0.36      | -0.06            |

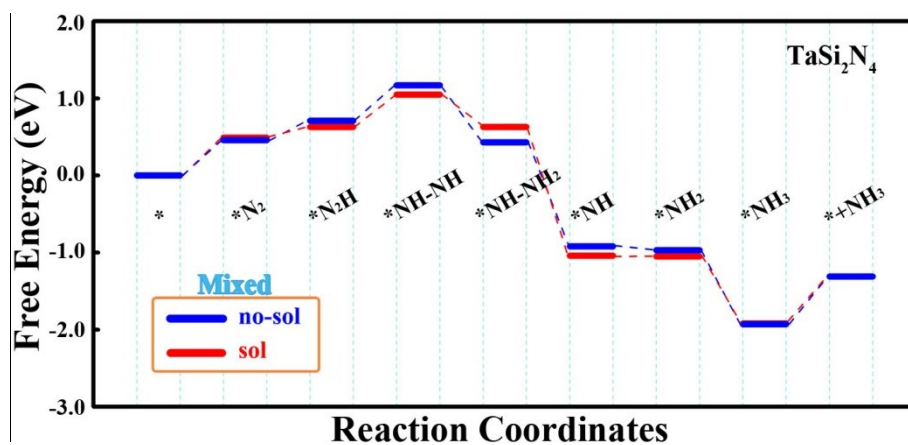

**Figure S1.** Free energy diagrams of NRR catalyzed by the TaSi<sub>2</sub>N<sub>4</sub> monolayer along mixed pathway without and with aqueous solvent.

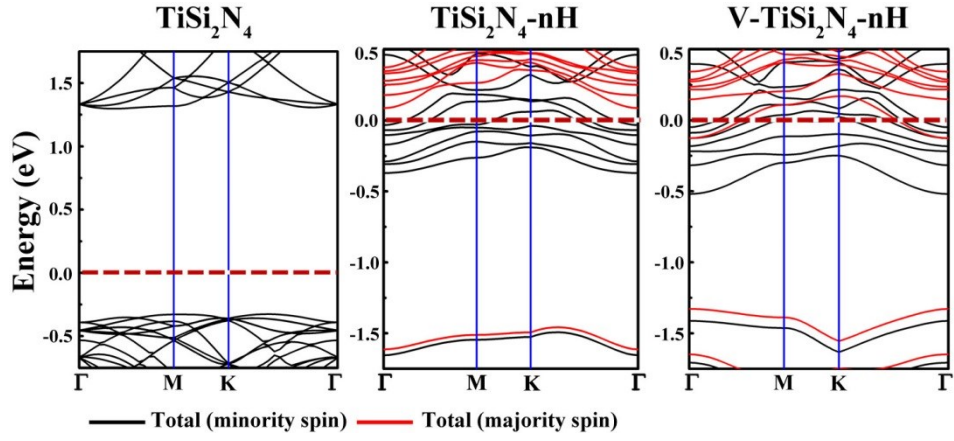

**Figure S2.** Band structures of  $\text{TiSi}_2\text{N}_4$ ,  $\text{TiSi}_2\text{N}_4\text{-nH}$  (pre-hydrogenation) and  $\text{V-TiSi}_2\text{N}_4\text{-nH}$  (with the N-vacancy). The Fermi level is set to zero.

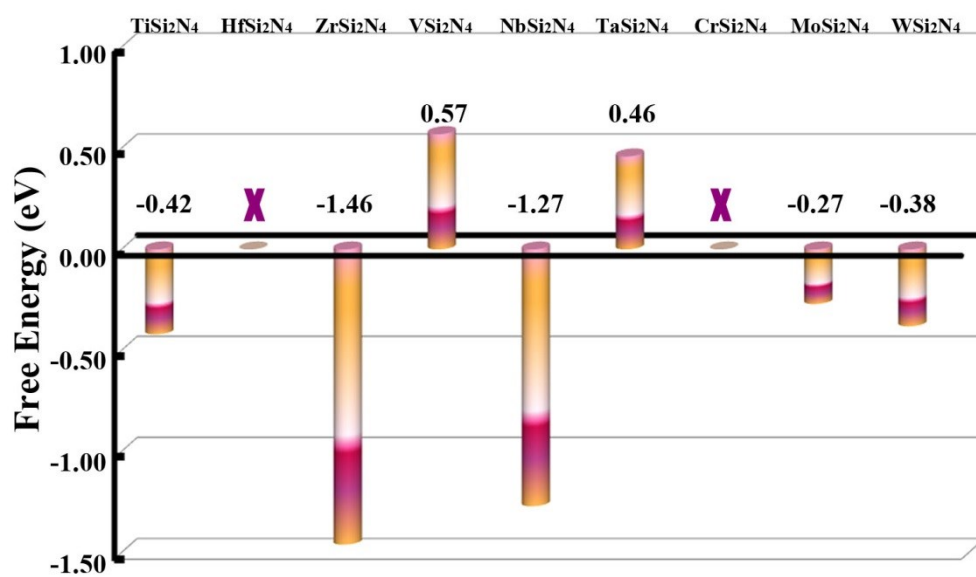

**Figure S3.** Adsorption free energies of N<sub>2</sub> on 9 kinds of defective MSi<sub>2</sub>N<sub>4</sub> materials.

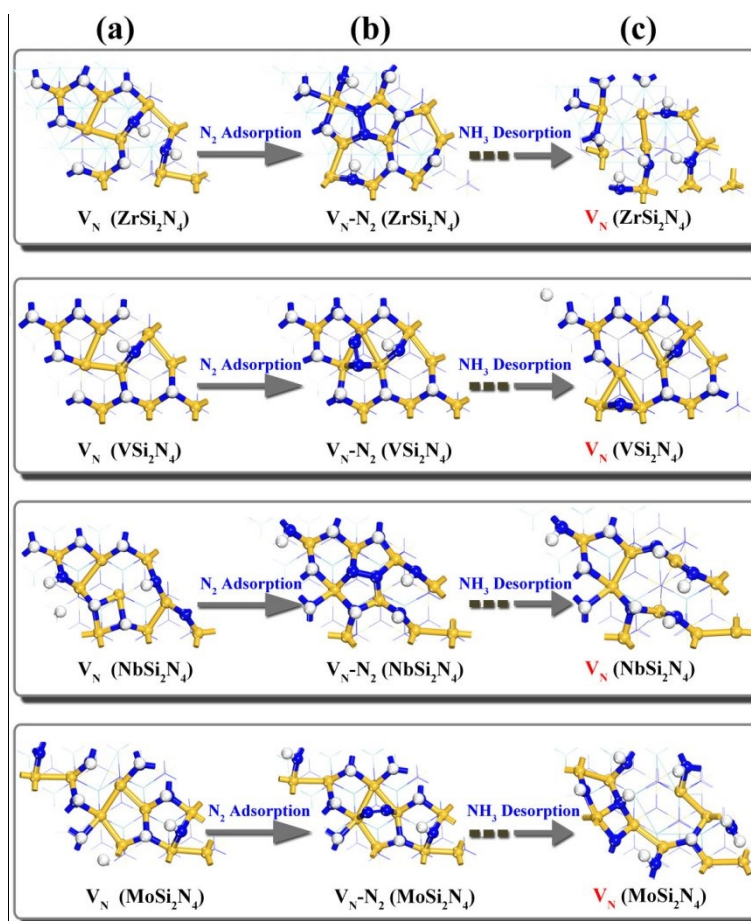

**Figure S4.** Illustrations of surface reconstruction on the  $\text{ZrSi}_2\text{N}_4$ ,  $\text{VSi}_2\text{N}_4$ ,  $\text{NbSi}_2\text{N}_4$  and  $\text{MoSi}_2\text{N}_4$  monolayers. The observed strong surface reconstruction means that  $\text{N}_2$  cannot be captured again after  $\text{NH}_3$  desorption.

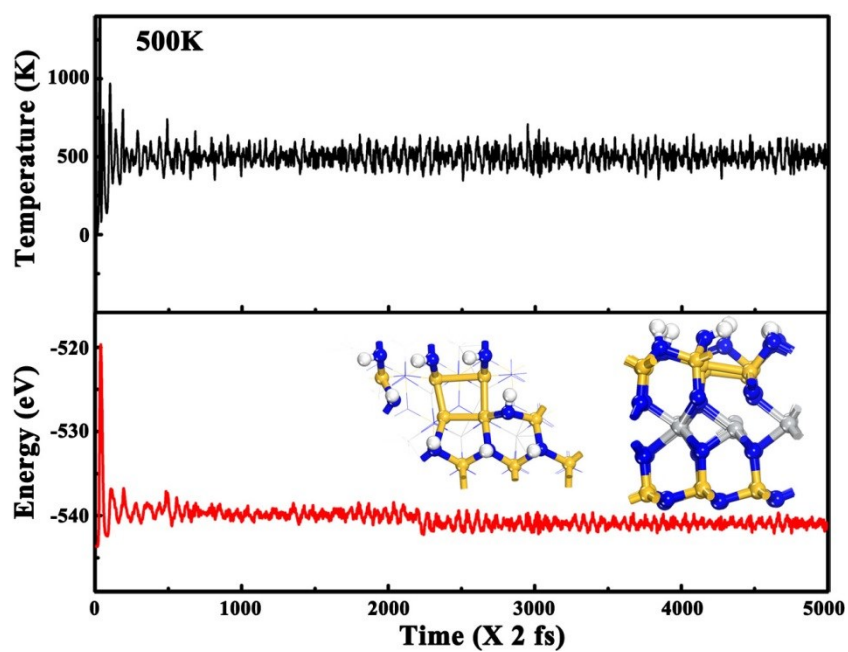

**Figure S5.** Variations of the temperature and total energy vs time for AIMD simulations of  $\text{TiSi}_2\text{N}_4$ . Insets are the top and side views of snapshots at 10 ps.

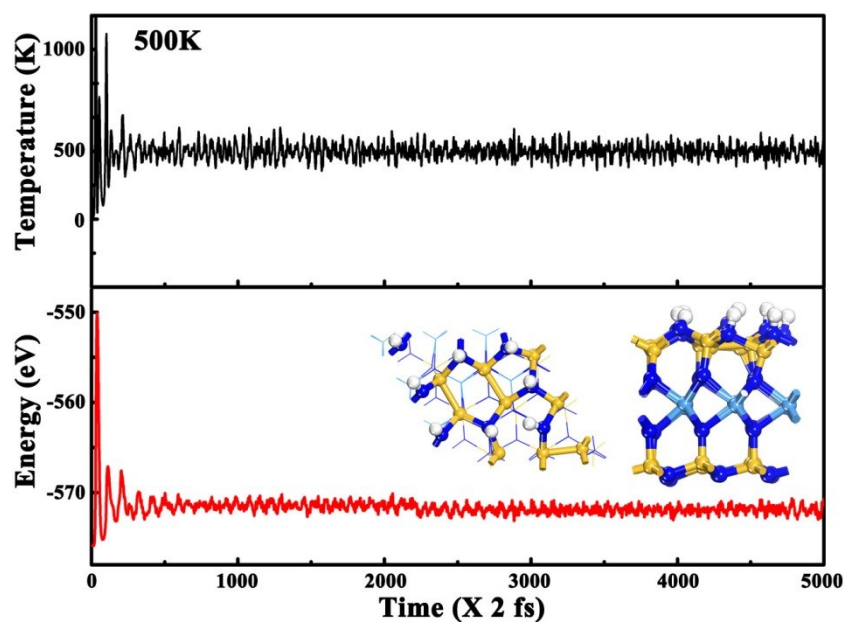

**Figure S6.** Variations of the temperature and total energy vs time for AIMD simulations of  $\text{TaSi}_2\text{N}_4$ . Insets are the top and side views of snapshots at 10 ps.

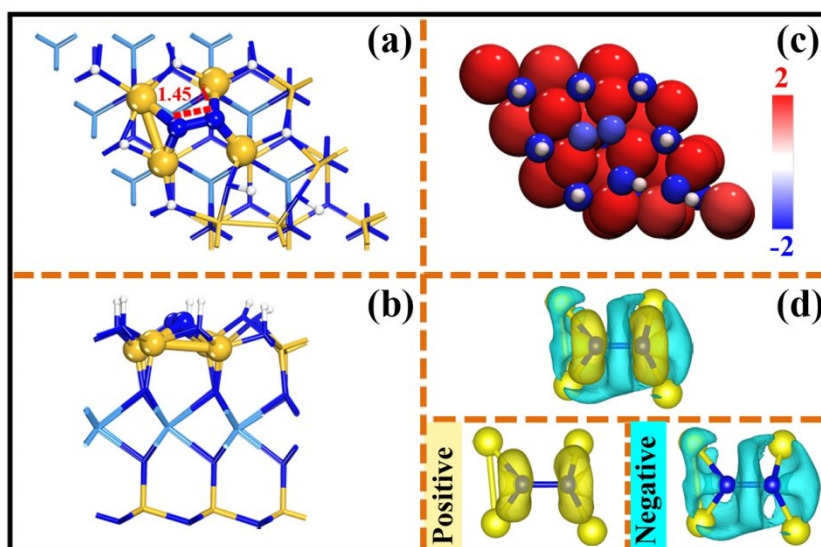

**Figure S7.** (a) Top and (b) side views of N<sub>2</sub> adsorbed on TaSi<sub>2</sub>N<sub>4</sub>. (c) Atomic charge coloring chart and (d) charge density difference of N<sub>2</sub> on the TiSi<sub>2</sub>N<sub>4</sub> monolayer. The isosurface value is set to be 0.003 e/Å<sup>3</sup> and the positive and negative charges are shown in yellow and cyan, respectively.

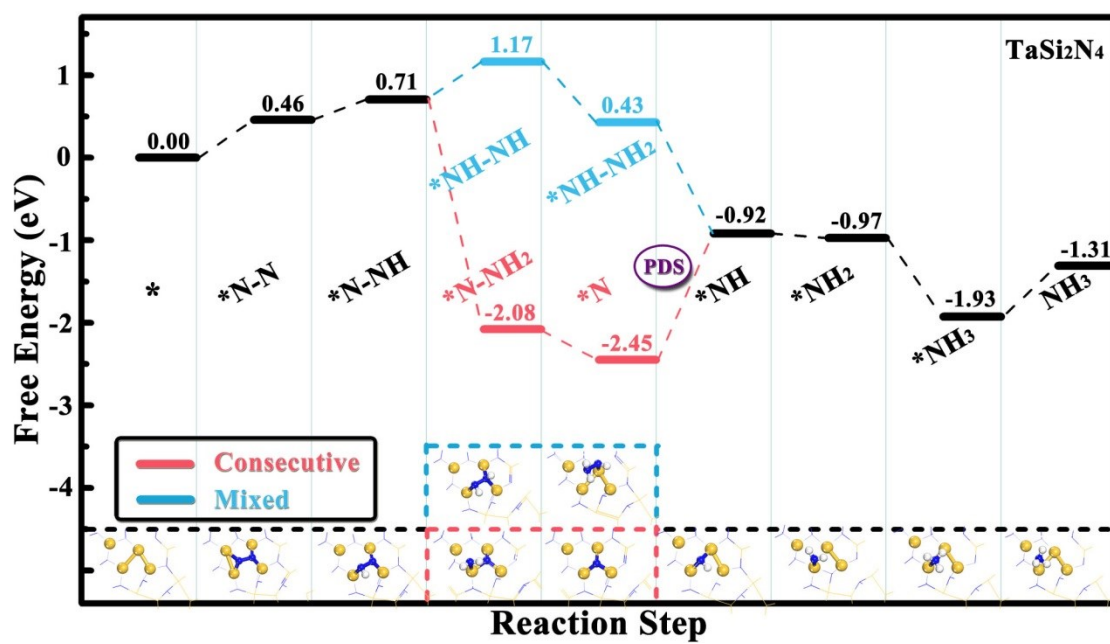

**Figure S8.** Free energy diagrams for  $N_2$  reduction on  $TaSi_2N_4$  through mixed and consecutive mechanisms.

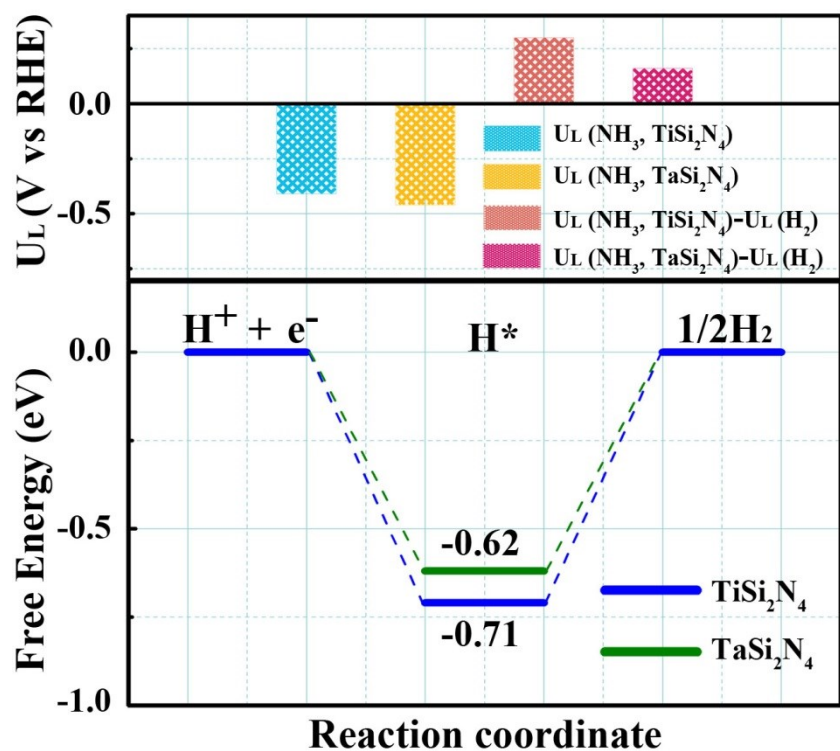

**Figure S9.** Free energy diagrams for HER on TiSi<sub>2</sub>N<sub>4</sub> and TaSi<sub>2</sub>N<sub>4</sub>. The limiting potentials for HER  $U_L(\text{H}_2)$ , NRR  $U_L(\text{NH}_3)$ , and the difference between them  $U_L(\text{NH}_3) - U_L(\text{H}_2)$  on two catalysts.
